# Supplementary material for: Estimating historical exposure to perfluoroalkyl acids in Security, Fountain, and Widefield Colorado: use of water-infrastructure blending and toxicokinetic models
Source: Royal Society of Chemistry journal article supplement (doi:10.1039/d2em00337f), 2023-01-01
Supplement: d2em00337f1.pdf [file d2em00337f1.pdf]

## ARTICLE

### Estimating Historical Exposure to Perfluoroalkyl Acids in Security, Fountain, and Widefield Colorado: Use of water-infrastructure blending and toxicokinetic models – Supplemental Information

Jessica Meeks, Sarah Mass, John L. Adgate, Kelsey Barton, Kamini Singha, John McCray, Anne P. Starling, Christopher Higgins

| Half-life (years) | k (1/years) | 1-EXP(-k) | 1-EXP(-k)/k | EXP(-kt) (where t=0.5 years) | Average factor for intake term |
|-------------------|-------------|-----------|-------------|------------------------------|--------------------------------|
| 3.9               | 0.178       | 0.162     | 0.916       | 0.915                        | 0.9399                         |
| 9.7               | 0.071       | 0.069     | 0.965       | 0.965                        |                                |

SI Table 1: The exact solution to the differential equation for the one-compartment model with constant intake includes a factor of  $(1-\exp(-k_t))/k_t$  on the intake term. To account for the range of half-lives, where menstruating and breastfeeding females have an elimination half-life range for PFHxS of 3.9 to 5.9 years; and males, non-menstruating and pregnant females have an elimination half-life range for PFHxS of 6 to 9.7 years, applied the average factor for the collective range of 3.9 to 9.7 years.

|                            | Mean  | 95 CI | Standard Deviation (SD) | Log Mean used in monte Carlo | Log SD used in monte Carlo |
|----------------------------|-------|-------|-------------------------|------------------------------|----------------------------|
| <b>Birth to &lt;1 year</b> | 0.438 | 0.913 | 0.289                   | -1.006                       | 0.40                       |
| <b>1 to &lt;2 years</b>    | 0.438 | 0.913 | 0.289                   | -1.006                       | 0.40                       |
| <b>2 to &lt;3 years</b>    | 0.576 | 1.092 | 0.314                   | -0.682                       | 0.34                       |
| <b>3 to &lt;6 years</b>    | 0.576 | 1.092 | 0.314                   | -0.682                       | 0.34                       |
| <b>6 to &lt;11 years</b>   | 0.576 | 1.092 | 0.314                   | -0.682                       | 0.34                       |
| <b>11 to &lt;16 years</b>  | 0.576 | 1.092 | 0.314                   | -0.682                       | 0.34                       |
| <b>16 to &lt;21 years</b>  | 1.552 | 1.809 | 0.156                   | 0.435                        | 0.07                       |
| <b>21 to &lt;50 years</b>  | 1.552 | 2.862 | 0.796                   | 0.323                        | 0.32                       |
| <b>50+ years</b>           | 1.49  | 2.615 | 0.684                   | 0.303                        | 0.29                       |

SI Table 2: The volume of water consumed was determined using the mean and 95% shrinkage estimates of long-term consumption rates generated by Cuvelier et al. 2021

|                                    |            |                      |
|------------------------------------|------------|----------------------|
| Hydraulic Conductivity             | 500        | ft/day               |
| Avg. Hydraulic Gradient            | 0.01107345 | ft/ft                |
| Effective Porosity                 | 0.10       | (decimal)            |
| Groundwater Velocity               | 0.62       | ft/day               |
| Initial PFHxS concentration        | 760000     | mg/L                 |
| Longitudinal Dispersivity          | 2655       | ft                   |
| Coefficient of Molecular Diffusion | 0.001      | ft <sup>2</sup> /day |

SI Table 3: Parameters used in Ogata-Banks calculator for estimating dispersion in the leading edge of the plume.

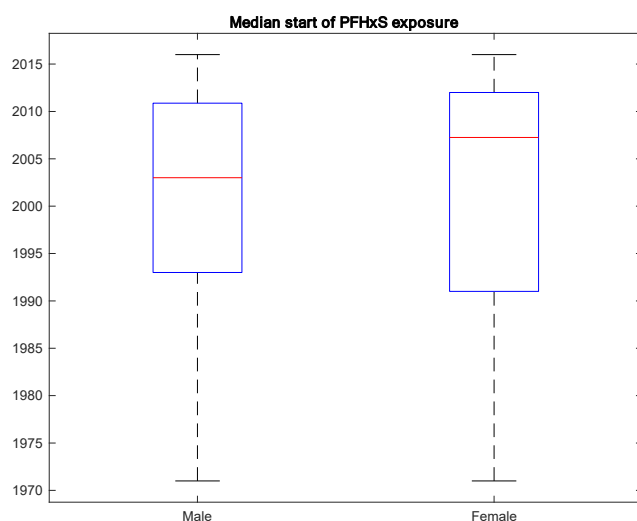

SI Figure 1: Median start of PFHxS exposure for women and men within the study population

| Age Group        | Weight 5 <sup>th</sup> %                                                  | Mean weight | Weight 95 <sup>th</sup> % |
|------------------|---------------------------------------------------------------------------|-------------|---------------------------|
| Birth to <1 year | 5.2                                                                       | 6.8         | 8.5                       |
| 1 to <2 years    | 8.9                                                                       | 11.4        | 14                        |
| 2 to <3 years    | 10.9                                                                      | 13.8        | 17.1                      |
| 3 to <6 years    | 13.5                                                                      | 18.6        | 26.2                      |
| 6 to <11 years   | 19.7                                                                      | 31.8        | 52.5                      |
| 11 to <16 years  | 34                                                                        | 56.8        | 88.8                      |
| 16 to <21 years  | 48.2                                                                      | 71.6        | 108                       |
| <52 years        | Weight is assumed the same as 2018 self-report from age 21 to age in 2018 |             |                           |

SI Table 4: Age weighting brackets used in the pharmacokinetic model
